# Supplementary material for: Retinal dysfunction induced in a mouse model of unilateral common carotid artery occlusion
Source: PeerJ. 2021 Jun 21;9:e11665. doi: 10.7717/peerj.11665 (PMC8223895; doi:10.7717/peerj.11665)
Supplement: Supplemental Information 1 [file peerj-09-11665-s001.xlsx]

## Sheet: ERG_Day 3
		L: the left eye										R: the right eye
			L	L	L	L	L	L	L	L			R	R	R	R	R	R	R	R
		a-wave（μV)	Sham_1	Sham_2	Sham_3	Sham_4	Sham_5	Sham_6	Sham_7	Sham_8		a-wave（μV)	Sham_1	Sham_2	Sham_3	Sham_4	Sham_5	Sham_6	Sham_7	Sham_8
		0.02 cd s/m2	7.63	9.67	0.19	7.77	3.31	14.98	18.34	5.68		0.02 cd s/m2	21.12	14.82	4.62	13.58	2.63	0.42	11.64	0.1
		0.1 cd s/m2	0	60.32	11.03	24.47	40.66	170.08	32.19	45.1		0.1 cd s/m2	13.48	60.64	22.67	18.62	9.29	27.03	15.88	30.94
		0.5 cd s/m2	99.11	144.52	87.48	98.01	142.01	102.51	112.77	114.74		0.5 cd s/m2	172.48	149.05	140.35	95.13	84.61	114.7	80.43	33.66
		2 cd s/m2	176.25	204.2	130.94	144.64	171.79	144.24	145.72	159.84		2 cd s/m2	261.44	219.02	189.62	146.09	88.4	133.58	129.23	64.39
		10 cd s/m2	217.87	253.46	178.89	187.52	230.2	169.72	171.52	168.4		10 cd s/m2	312.47	307.44	244.68	171.28	135.27	154.12	177.3	105.55
		50 cd s/m2	292.57	311.57	241.53	261.6	239.7	179.83	173.99	179.44		50 cd s/m2	394.59	367.53	318.59	193.68	144.21	150.54	169.22	128.77
			L	L	L	L	L	L	L	L			R	R	R	R	R	R	R	R
		b-wave（μV)	Sham_1	Sham_2	Sham_3	Sham_4	Sham_5	Sham_6	Sham_7	Sham_8		b-wave（μV)	Sham_1	Sham_2	Sham_3	Sham_4	Sham_5	Sham_6	Sham_7	Sham_8
		0.02 cd s/m2	262.15	260.68	180.98	206.82	281.5	214.71	193.34	138.85		0.02 cd s/m2	330.53	271.47	277.48	203.75	163.59	148.73	185.14	105.51
		0.1 cd s/m2	285.02	273.62	207.94	230	278.37	172.91	198.45	141.1		0.1 cd s/m2	361.05	286.69	300.24	226.82	143.24	24.27	173.83	74.16
		0.5 cd s/m2	320.42	393.76	269.96	264.15	329.08	227.43	273.35	223.74		0.5 cd s/m2	445.95	412.22	377.31	278.36	202.47	235.74	282.77	152.36
		2 cd s/m2	409.27	466.07	316.65	329.03	399.95	290.39	322.12	250		2 cd s/m2	559.18	474.42	431.08	340.54	261.28	264.44	281.2	165.77
		10 cd s/m2	476.25	489.26	392.81	402.88	422.81	318.88	340.22	265.63		10 cd s/m2	648.61	571.36	515.32	383.11	268.85	300.04	333.68	210.27
		50 cd s/m2	588.15	634.3	466.08	532.36	417.15	346.43	359.73	262.38		50 cd s/m2	829.53	704.23	583.11	436.32	224.33	299.13	340.29	208.75
			L	L	L	L	L	L	L	L			R	R	R	R	R	R	R	R
		a-wave（μV)	UCCAO_1	UCCAO_2	UCCAO_3	UCCAO_4	UCCAO_5	UCCAO_6	UCCAO_7	UCCAO_8		a-wave（μV)	UCCAO1	UCCAO2	UCCAO3	UCCAO4	UCCAO5	UCCAO6	UCCAO7	UCCAO8
		0.02 cd s/m2	1.35	6.43	2.81	10.28	17.84	3.69	32.5	26.99		0.02 cd s/m2	7.19	14.99	15.46	24.98	16.56	0.27	17.82	17.09
		0.1 cd s/m2	21.56	38.62	35.45	16.41	35.29	50.98	10.3	55.26		0.1 cd s/m2	27.5	51.97	22.05	31.66	15.99	39.16	0.1	33.51
		0.5 cd s/m2	102.47	134.14	123.19	138.78	114.63	111.14	75.38	147.15		0.5 cd s/m2	130.37	156.01	118.2	176.18	100.63	92.5	110.71	95.22
		2 cd s/m2	114.77	179.79	177.35	227.32	147.19	143.52	65.17	187.15		2 cd s/m2	166.21	216.61	183.49	224.21	137.78	117.69	94.48	123.15
		10 cd s/m2	154.71	243.19	259.96	275.45	172.39	173.85	114.03	214.68		10 cd s/m2	214.77	285.87	238.83	294.35	142.63	149.73	0.1	143.02
		50 cd s/m2	215.03	282.13	349.29	312.76	166.94	180.35	109.66	199.39		50 cd s/m2	299.04	365.95	356.56	349.23	148.83	151.86	0.1	137.25
			L	L	L	L	L	L	L	L			R	R	R	R	R	R	R	R
		b-wave（μV)	UCCAO_1	UCCAO_2	UCCAO_3	UCCAO_4	UCCAO_5	UCCAO_6	UCCAO_7	UCCAO_8		b-wave（μV)	UCCAO1	UCCAO2	UCCAO3	UCCAO4	UCCAO5	UCCAO6	UCCAO7	UCCAO8
		0.02 cd s/m2	199.44	256.36	258.66	332.62	202.52	190.93	143.59	152.29		0.02 cd s/m2	203.14	239.4	228.3	242.38	164.8	172	41.69	73.2
		0.1 cd s/m2	155.44	276.79	225.47	324.96	198.14	209.34	182.1	197.37		0.1 cd s/m2	165.07	259.21	243.91	237.8	180.63	190.83	1.89	74.92
		0.5 cd s/m2	249.51	336.23	329.17	402.14	268.59	271.91	204.65	269.12		0.5 cd s/m2	274.88	331.32	335.7	338.43	237.85	232.5	64.65	135.12
		2 cd s/m2	294.86	371.36	414.49	489.28	312.39	307.72	199.93	306.45		2 cd s/m2	319.18	375.44	410.59	362.56	293.58	271.4	85.91	162.25
		10 cd s/m2	334.88	424.44	510.87	598.36	321.29	345.17	218.66	340.49		10 cd s/m2	363.33	445.78	469.43	404.53	305.47	295.29	1.05	174.99
		50 cd s/m2	414.72	519.54	603.8	724.17	338.72	305.55	288.14	336.22		50 cd s/m2	419.86	578.55	590	542.01	304.49	284.72	34.04	198.1

## Sheet: ERG_Day 7
		L: the left eye										R: the right eye
			L	L	L	L	L	L	L	L			R	R	R	R	R	R	R	R
		a-wave（μV)	Sham_1	Sham_2	Sham_3	Sham_4	Sham_5	Sham_6	Sham_7	Sham_8		a-wave（μV)	Sham_1	Sham_2	Sham_3	Sham_4	Sham_5	Sham_6	Sham_7	Sham_8
		0.02 cd s/m2	5.26	23.2	8.15	13.41	1.24	13.34	0.38	9.75		0.02 cd s/m2	1.2	13.61	1	3.24	0.07	1.09	2.38	0.22
		0.1 cd s/m2	43.76	82.7	37.46	53.55	34.65	9.73	6.75	45.95		0.1 cd s/m2	27.14	49.8	9.63	15.49	19.76	15.04	4.27	14.53
		0.5 cd s/m2	144.05	200.52	102.12	174.73	129.5	136.25	32.61	105.84		0.5 cd s/m2	108.5	152.12	45.81	102.44	79.97	87.6	35.39	11.64
		2 cd s/m2	155.64	239.24	140.34	181.16	145.42	86.16	48.15	131.63		2 cd s/m2	117.9	175.87	69.79	96.22	135.96	110.78	41.37	27.87
		10 cd s/m2	208.18	275.86	130.24	226.35	166.04	104.87	59.83	134.63		10 cd s/m2	147.3	216.85	70.94	132.76	172.8	169.97	64.29	66.94
		50 cd s/m2	230.43	268.85	155.16	202.02	208.48	112.56	64.8	116.01		50 cd s/m2	155.84	242.62	85.23	110.56	207.04	192.85	84.88	76.8
			L	L	L	L	L	L	L	L			R	R	R	R	R	R	R	R
		b-wave（μV)	Sham_1	Sham_2	Sham_3	Sham_4	Sham_5	Sham_6	Sham_7	Sham_8		b-wave（μV)	Sham_1	Sham_2	Sham_3	Sham_4	Sham_5	Sham_6	Sham_7	Sham_8
		0.02 cd s/m2	265.24	311.33	188.83	322.31	241.79	86.35	20.86	68.14		0.02 cd s/m2	251.57	253.38	92.23	209.51	234	44.43	10.73	17.75
		0.1 cd s/m2	276.22	302.04	202.86	303.69	254.51	92.44	23.96	102.18		0.1 cd s/m2	242.96	240.01	120.14	186.8	254.05	116.84	36.56	40.88
		0.5 cd s/m2	362.25	442.56	269.72	400.86	331.15	137.45	57.74	131.28		0.5 cd s/m2	268.11	392.68	152.47	253	311.34	73.23	61.91	56.24
		2 cd s/m2	406.53	467.63	292.93	446.94	356.36	163.58	82.09	165.07		2 cd s/m2	344.23	384.49	148.7	275.48	366.05	181.45	78.02	71.4
		10 cd s/m2	471.1	518.08	312.47	462.69	422.36	192.07	103.45	171.86		10 cd s/m2	371.64	429.28	180.6	293.64	431.22	260.03	128.64	103.55
		50 cd s/m2	412.02	466.95	285.81	427.83	334.18	172.49	110.9	179.91		50 cd s/m2	329.81	366.53	153.94	265.01	353.19	239.71	154.51	97.39
			L	L	L	L	L	L	L	L			R	R	R	R	R	R	R	R
		a-wave（μV)	UCCAO_1	UCCAO_2	UCCAO_3	UCCAO_4	UCCAO_5	UCCAO_6	UCCAO_7	UCCAO_8		a-wave（μV)	UCCAO_1	UCCAO_2	UCCAO_3	UCCAO_4	UCCAO_5	UCCAO_6	UCCAO_7	UCCAO_8
		0.02 cd s/m2	14.77	23.18	28.38	0.15	17.06	11.37	4.03	9.45		0.02 cd s/m2	3.86	12.2	7.8	1.79	0.15	0.15	22.33	0.93
		0.1 cd s/m2	60.73	56.15	59.52	35.85	33.98	18.12	8.05	16.3		0.1 cd s/m2	22.96	20.82	13.67	18.4	10.12	7.59	1.55	21.28
		0.5 cd s/m2	160.33	140.02	124.93	94.51	79.49	67.17	64.1	71.87		0.5 cd s/m2	54.53	75.41	47.44	43.16	35.98	1.67	1.63	35.48
		2 cd s/m2	223.45	202.99	156.37	150.36	103.43	94.01	89.18	139.06		2 cd s/m2	93.4	132.88	91.54	42.12	50.35	0.15	0.15	67.83
		10 cd s/m2	247.72	243.76	172.83	175.99	118.86	113.42	110.17	182.53		10 cd s/m2	125.88	159.87	138.12	156.5	67.95	0.15	0.15	101.09
		50 cd s/m2	247.18	231.05	164.82	205.12	113.37	119.7	118.43	202.66		50 cd s/m2	132.44	172.33	111.63	0.15	55.07	0.15	0.1	120.86
			L	L	L	L	L	L	L	L			R	R	R	R	R	R	R	R
		b-wave（μV)	UCCAO_1	UCCAO_2	UCCAO_3	UCCAO_4	UCCAO_5	UCCAO_6	UCCAO_7	UCCAO_8		b-wave（μV)	UCCAO_1	UCCAO_2	UCCAO_3	UCCAO_4	UCCAO_5	UCCAO_6	UCCAO_7	UCCAO_8
		0.02 cd s/m2	103.8	138.49	118.8	95.85	64.98	76.06	76.37	69.96		0.02 cd s/m2	21.38	62.48	60.35	50.54	0	0.1	32.15	32.53
		0.1 cd s/m2	171.75	196.54	168.12	136.61	99.01	107.59	105.35	155.69		0.1 cd s/m2	49.03	116.74	99.95	128.19	34.79	8.86	3.35	89.19
		0.5 cd s/m2	269.93	275.54	246.31	182.13	147.36	134.98	128.01	190.82		0.5 cd s/m2	85.67	173.19	128.3	97.87	58.19	9.64	6.12	121.38
		2 cd s/m2	350.12	332.59	291.77	214.26	187.18	163.49	158.66	243.88		2 cd s/m2	127.6	200.86	171.64	117.56	71.74	1.86	1.38	153.39
		10 cd s/m2	377.19	363.68	300.27	259.87	195.49	191.84	187.66	299.24		10 cd s/m2	172.04	255.61	205.65	218.1	73.48	0.15	0.09	223.79
		50 cd s/m2	366.17	353.13	297.03	352.1	203.37	206	194.96	324.03		50 cd s/m2	181.67	272.63	233.17	0	86.95	0.15	0.07	239.07

## Sheet: ERG_Day 14
		L: the left eye										R: the right eye
			L	L	L	L	L	L	L	L			R	R	R	R	R	R	R	R
		a-wave（μV)	Sham_1	Sham_2	Sham_3	Sham_4	Sham_5	Sham_6	Sham_7	Sham_8		a-wave（μV)	Sham_1	Sham_2	Sham_3	Sham_4	Sham_5	Sham_6	Sham_7	Sham_8
		0.02 cd s/m2	7.68	39.27	5.53	9.75	10.87	9.79	22.06	31.01		0.02 cd s/m2	15.91	39.73	15.32	8.18	15.19	2.47	10.14	36.72
		0.1 cd s/m2	36.19	0	26.18	13.73	6.11	8.06	30.64	21.27		0.1 cd s/m2	40.3	1.8	26.82	19.76	24.65	18.78	6.28	7.18
		0.5 cd s/m2	81.32	61.77	95.36	62.16	80.86	39.6	123.69	76.89		0.5 cd s/m2	82.01	86.42	113.4	111.14	96.53	87.25	72.97	83.7
		2 cd s/m2	101.72	90.27	98.15	118.71	84.74	59.11	169.3	97.73		2 cd s/m2	114.11	122.8	127.35	173.48	116.76	131.87	126.57	109.64
		10 cd s/m2	132.99	115.53	117.44	163.49	141.45	46.63	223.04	132.46		10 cd s/m2	133.67	141.61	142.91	211.85	140.62	129.82	163.78	132.35
		50 cd s/m2	185.55	140.19	148.76	213.01	233.88	77.28	239.77	127.54		50 cd s/m2	173.63	179.8	181.51	260.21	151.7	145.03	203.54	170.68
			L	L	L	L	L	L	L	L			R	R	R	R	R	R	R	R
		b-wave（μV)	Sham_1	Sham_2	Sham_3	Sham_4	Sham_5	Sham_6	Sham_7	Sham_8		b-wave（μV)	Sham_1	Sham_2	Sham_3	Sham_4	Sham_5	Sham_6	Sham_7	Sham_8
		0.02 cd s/m2	150.42	67.57	82.55	119.3	221.73	75.14	187.6	111.69		0.02 cd s/m2	189.61	145.13	168.08	169.02	220.55	134.41	183.99	174.37
		0.1 cd s/m2	162.82	172.8	159.55	148.8	219.16	70.6	218.01	110.06		0.1 cd s/m2	193.94	164.49	176.57	201.67	207.97	100.5	197.25	150.04
		0.5 cd s/m2	210.91	205.96	221.94	222.12	259.56	94.76	300.79	158.72		0.5 cd s/m2	236.8	231.71	283.47	297.88	242.84	178.39	245.22	225.35
		2 cd s/m2	241.45	210.02	226.56	257.24	287.3	113.36	353.71	193.86		2 cd s/m2	253.64	234.11	277.82	345.35	258.67	222.47	283.94	233.54
		10 cd s/m2	242.96	223.31	237.47	303.57	350.61	158	423.71	211.63		10 cd s/m2	227.36	258.6	289.21	367.42	265.35	243.52	335.06	236.25
		50 cd s/m2	274.27	246.26	260.03	302.66	459.56	111.17	375.62	200.54		50 cd s/m2	256.96	299.72	303.68	403.53	304.57	227.74	259.61	193.62
			L	L	L	L	L	L	L	L			R	R	R	R	R	R	R	R
		a-wave（μV)	UCCAO_1	UCCAO_2	UCCAO_3	UCCAO_4	UCCAO_5	UCCAO_6	UCCAO_7	UCCAO_8		a-wave（μV)	UCCAO_1	UCCAO_2	UCCAO_3	UCCAO_4	UCCAO_5	UCCAO_6	UCCAO_7	UCCAO_8
		0.02 cd s/m2	0	15.88	13.72	1.73	5.93	11.38	11.1	30.14		0.02 cd s/m2	16.5	4.85	8.45	0.02	25.63	24.3	0	3.71
		0.1 cd s/m2	30.37	30.39	9.94	6.17	0.91	20.53	44.81	24.99		0.1 cd s/m2	8.97	9.18	0	32.53	2.48	0	6.64	29.38
		0.5 cd s/m2	111.02	99.71	157.52	76.09	27.82	85.44	175.45	109.32		0.5 cd s/m2	61.69	98.37	54.49	42.29	75.61	34.63	2.19	103.95
		2 cd s/m2	139.94	87.16	210.87	111.1	65.75	93.42	213.8	107.42		2 cd s/m2	81.02	93.88	30.92	49.63	73.02	28.37	10.31	123.4
		10 cd s/m2	177.74	157.61	265.72	126.81	76.96	84.82	229.45	118.92		10 cd s/m2	101.86	120.67	0	61.72	104.72	22.18	31.51	144.77
		50 cd s/m2	218.72	179.93	290.72	127.73	104.48	140.82	255.71	150.69		50 cd s/m2	150.07	163.25	71.9	44.9	145.23	0	0	128.19
			L	L	L	L	L	L	L	L			R	R	R	R	R	R	R	R
		b-wave（μV)	UCCAO_1	UCCAO_2	UCCAO_3	UCCAO_4	UCCAO_5	UCCAO_6	UCCAO_7	UCCAO_8		b-wave（μV)	UCCAO_1	UCCAO_2	UCCAO_3	UCCAO_4	UCCAO_5	UCCAO_6	UCCAO_7	UCCAO_8
		0.02 cd s/m2	211.72	162.04	249.49	176.96	80.32	150.79	256.76	60.21		0.02 cd s/m2	132.53	91.3	19.96	9.83	133.5	38.83	48.5	89.35
		0.1 cd s/m2	228.96	245.74	302.4	131.7	107.68	159.47	222.19	102.46		0.1 cd s/m2	141.69	119.63	49.82	57.25	129.65	4.05	33.66	115.7
		0.5 cd s/m2	306.01	266.5	403.29	211.16	113.83	214.02	362.63	148.63		0.5 cd s/m2	187.01	185.02	79.66	124.54	153.39	45.55	55.3	160.43
		2 cd s/m2	313.2	345.54	495.48	250.03	160.14	247.52	391.98	216.36		2 cd s/m2	196.58	213.29	29.29	112.63	143.67	12.63	30.18	198.31
		10 cd s/m2	369.16	289.58	488.5	304.67	161.24	285.71	424.97	223.15		10 cd s/m2	227.68	199.02	2.61	144.83	186.9	60.52	82.15	209.22
		50 cd s/m2	351.15	344.42	582.71	299.06	150.8	249.31	414.94	175.02		50 cd s/m2	242.83	279.1	168.25	66.22	221.96	4.63	0.14	183.41

## Sheet: ERG_OPs
		L: the left eye										R: the right eye
			L	L	L	L	L	L	L	L			R	R	R	R	R	R	R	R
		μV	Sham_1	Sham_2	Sham_3	Sham_4	Sham_5	Sham_6	Sham_7	Sham_8		μV	Sham_1	Sham_2	Sham_3	Sham_4	Sham_5	Sham_6	Sham_7	Sham_8
		OP1	62.3	51.04	64.17	63.26	116.35	44	48.67	48.63		OP1	62.59	58.15	75.05	65.75	76.21	59.42	66.27	55.35
		OP2	261.03	259.51	314.49	297.66	380.28	176.4	220.52	196.55		OP2	282.07	255.72	299.5	294.23	327.79	255.31	232.33	189.88
		OP3	208.68	209.93	246.25	243.89	306.25	144.49	177.36	186.09		OP3	211.54	196.19	217.83	241.39	239.27	205.24	169.23	159.06
		OP4	50.53	54.4	68.66	78.65	84.11	56.66	82.02	69.83		OP4	46.29	57.93	56.3	66.8	78.53	74.7	55.88	49.7
		ΣOPs	582.54	574.88	693.57	683.46	886.99	421.55	528.57	501.1		ΣOPs	602.49	567.99	648.68	668.17	721.8	594.67	523.71	453.99
			L	L	L	L	L	L	L	L			R	R	R	R	R	R	R	R
		μV	UCCAO_1	UCCAO_2	UCCAO_3	UCCAO_4	UCCAO_5	UCCAO_6	UCCAO_7	UCCAO_8		μV	UCCAO_1	UCCAO_2	UCCAO_3	UCCAO_4	UCCAO_5	UCCAO_6	UCCAO_7	UCCAO_8
		OP1	93.24	83.19	124.02	111.44	38.9	79.56	101.79	48.51		OP1	53	29.69	8.69	8.46	57.55	0	17.38	33.29
		OP2	379.39	329.48	523.22	378.53	182.5	297.48	381.26	190.92		OP2	257.08	165.66	13.57	10.46	224.26	9.73	24.33	131.35
		OP3	339.8	241.58	430.35	265.71	210.92	233.69	246.37	120.23		OP3	235.24	138.04	2.87	29.52	172.43	20.17	23.97	97.54
		OP4	128.54	49.72	148.93	80.61	101.15	65.01	67.06	24.65		OP4	82.87	44.78	3.53	13.24	28.27	23.99	13.01	18.87
		ΣOPs	940.97	703.97	1226.52	836.29	533.47	675.74	796.48	384.31		ΣOPs	628.19	378.17	28.66	61.68	482.51	53.89	78.69	281.05

## Sheet: ERG_ratio (b to a)
		L: the left eye
		R: the right eye
			0.1 cd s/m2	Sham	Sham	UCCAO	UCCAO			0.1 cd s/m2	Sham	Sham	UCCAO	UCCAO			0.1 cd s/m2	Sham	Sham	UCCAO	UCCAO
		Day 3	b/a ratio	L	R	L	R		Day 7	b/a ratio	L	R	L	R		Day 14	b/a ratio	L	R	L	R
				0.63577	3.75397	1.01048	0.841297				1.16	1.64	0.52	0.39				0.401961	0.429959	0.673565	1.41127
				2.64226	0.662624	1.0045	0.699057				0.67	0.88	0.64	1.03				0.544493	8.16454	0.722454	1.16429
				1.31737	1.85623	0.891428	1.55037				0.99	2.29	0.52	1.34				0.968272	0.588197	2.71807	0.157238
				0.959553	1.70732	2.77546	1.05272				1.04	2.21	0.7	1.28				3.20468	0.911841	1.90706	4.67074
				0.142489	2.16104	0.786927	1.58327				1.35	2.36	0.53	0.63				0.78259	0.753787	10.572	0.452909
				0.86406	0.125845	0.575528	0.682995				1.74	1.42	1.09	0.21				0.6357	0.478118	0.693993	0.351841
				0.438495	1.53422	2.47792	2.64896				0.65	1.57	2.4	0.4				0.462303	2.80622	0.443011
					0.335941	0.500592	0.313355				0.41	0.52	1.75	0.77					1.86701	0.366313
			10 cd s/m2	Sham	Sham	UCCAO	UCCAO			10 cd s/m2	Sham	Sham	UCCAO	UCCAO			10 cd s/m2	Sham	Sham	UCCAO	UCCAO
		Day 3	b/a ratio	L	R	L	R		Day 7	b/a ratio	L	R	L	R		Day 14	b/a ratio	L	R	L	R
				1.11123	1.05522	1.10037	0.859992				1.13	1.26	0.76	0.68				0.859561	0.800278	0.977215	1.05168
				0.981289	0.944749	0.887232	0.792718				0.94	0.99	0.75	0.8				0.90944	0.859202	0.864461	0.775994
				1.11625	1.07064	0.999012	0.999192				1.2	1.28	0.87	0.75				0.951379	0.952163	0.86497	1.10406
				1.09218	1.13706	1.1043	0.69864				1.02	1.11	0.74	0.7				0.873632	0.816009	1.13041	0.839732
				0.933699	1.01036	0.947441	1.08874				1.27	1.25	0.82	0.54				1.16622	0.887836	0.985754	1.2838
				0.955127	0.989662	1.00931	1.00255				0.92	0.77	0.85	0.5				1.59424	0.882579	1.58485	1.22665
				1.00835	0.956728	0.974803	5.33772				0.87	1	0.85	0.3				0.893813	0.962548	0.871427	0.679963
				0.801866	1.01271	0.806268	0.62199				0.64	0.78	0.82	1.11				0.751715	0.839863	0.882882

## Sheet: OCT_Day 3-14
		Total
		Day 3	Left	600	400	400	0	200	400	600			Right	600	400	200	0	200	400	600		Left	600	400	400	0	200	400	600			Right	600	400	200	0	200	400	600
			Sham 1	181	185	171		154	176	170			Sham 1	184	189	179		166	180	177		UCCAO 1	178	191	177		172	174	169			UCCAO 1	178	191	177		172	174	169
			Sham 2	173	176	165		164	173	166			Sham 2	190	187	173		172	178	174		UCCAO 2	181	189	166		160	174	171			UCCAO 2	181	189	166		160	174	171
			Sham 3	180	183	176		163	179	169			Sham 3	184	191	178		169	178	171		UCCAO 3	176	181	168		166	171	169			UCCAO 3	176	181	168		166	171	169
			Sham 4	184	191	174		169	180	169			Sham 4	180	184	174		165	178	173		UCCAO 4	178	181	165		154	177	168			UCCAO 4	180	188	172		178	182	167
			Sham 5	192	193	174		169	179	169			Sham 5	186	196	178		181	176	176		UCCAO 5	189	194	170		169	178	169			UCCAO 5	189	194	170		169	178	169
			Sham 6	175	177	167		168	175	167			Sham 6	173	176	171		171	174	171		UCCAO 6	174	179	168		164	173	166			UCCAO 6	176	178	167		167	172	175
			Sham 7	175	180	166		162	178	172			Sham 7	175	180	166		162	178	172		UCCAO 7	178	187	184		164	178	169			UCCAO 7	177	182	174		184	179	174
		Total
		Day 7	Left	600	400	200	0	200	400	600			Right	600	400	200	0	200	400	600		Left	600	400	200	0	200	400	600			Right	600	400	200	0	200	400	600
			Sham 1	181	188	170		165	176	167			Sham 1	179	191	179		182	185	177		UCCAO 1	177	187	173		172	180	173		Cataract	UCCAO 1
			Sham 2	174	181	168		169	174	164			Sham 2	182	194	180		168	185	173		UCCAO 2	175	181	176		169	175	163			UCCAO 2	186	182	167		175	180	174
			Sham 3	174	179	165		170	178	171			Sham 3	184	190	173		171	180	169		UCCAO 3	175	176	172		159	175	171			UCCAO 3	182	185	166		166	174	173
			Sham 4	178	184	171		153	179	169			Sham 4	182	190	179		172	171	170		UCCAO 4	176	175	160		166	174	165			UCCAO 4	177	185	163		169	177	172
			Sham 5	175	185	167		179	175	168			Sham 5	175	187	177		172	181	175		UCCAO 5	187	184	167		162	176	170			UCCAO 5	178	188	171		199	194	175
			Sham 6	179	182	172		167	176	167			Sham 6	182	184	178		169	175	172		UCCAO 6	186	194	187		171	178	175			UCCAO 6	186	192	179		171	178	172
		Total
		Day 14	Left	600	400	200	0	200	400	600			Right	600	400	200	0	200	400	600		Left	600	400	200	0	200	400	600			Right	600	400	200	0	200	400	600
			Sham 1	178	177	166		173	171	165			Sham 1	176	176	175		161	169	168		UCCAO 1	180	188	174		173	185	172			UCCAO 1	121	133	144		130	128	131
			Sham 2	178	187	166		176	180	174			Sham 2	180	186	170		171	179	170		UCCAO 2	175	176	171		162	174	165			UCCAO 2	175	182	168		168	182	172
			Sham 3	178	186	174		169	177	171			Sham 3	182	186	177		172	176	170		UCCAO 3	178	179	164		171	180	168			UCCAO 3	182	190	171		169	174	167
			Sham 4	177	181	165		165	171	166			Sham 4	171	186	175		163	179	173		UCCAO 4	181	190	177		174	176	171			UCCAO 4	185	192	177		175	177	173
			Sham 5	181	188	175		159	177	168			Sham 5	185	192	176		178	186	170		UCCAO 5	180	182	180		161	175	171			UCCAO 5	178	182	160		195	186	179
			Sham 6	182	177	170		160	179	172			Sham 6	181	188	185		169	181	177		UCCAO 6	186	186	174		157	194	214		Cataract	UCCAO 6

## Sheet: GFAP_D3-14 and TUNEL_D3-14
	GFAP						TUNEL
	Sham D3	Sham D3	UCCAO D3	UCCAO D3			Sham D3	Sham D3	UCCAO D3	UCCAO D3
	L	R	L	R			L	R	L	R
	1	1.33333	1.33333	2.16667			0	0	0	0.5
	0.833333	0.666667	1.16667	2.66667			0	0	0	0.25
	0.666667	1.33333	0.5	1.66667			0.25	0	0.25	0
	1	1.16667	1	2.16667			0	0.5	0	0
	0.666667	0.5	1	1.33333			0.25	0	0.25	0
	1.33333	0.833333	0.666667	1.5			0	0	0	0
	GFAP						TUNEL
	Sham D7	Sham D7	UCCAO D7	UCCAO D7			Sham D7	Sham D7	UCCAO D7	UCCAO D7
	L	R	L	R			L	R	L	R
	0.5	0.333333	1	3			0	0.25	0.25	0
	1.16667	1	0.5	3			0	0	0	9.75
	1	1	0.833333	2.5			0	0	0	3
	0.833333	0.666667	0.833333	2.83333			0	0.25	0	2.5
	1.16667	0.5	1.16667	2.66667			0	0	0	14
	1.16667	1.33333	0.666667	2.33333			0.25	0	0	5
	GFAP						TUNEL
	Sham D14	Sham D14	UCCAO 14	UCCAO 14			Sham D14	Sham D14	UCCAO 14	UCCAO 14
	L	R	L	R			L	R	L	R
	1.16667	1.16667	1.16667	2.33333			0	0.25	0	0
	1.5	1	1.5	2.33333			0	0	0	0
	0.5	1	1.33333	1.33333			0	0	0	0.25
	1	1.16667	0.333333	2.33333			0	0	0	0.25
	1	0.5	0.5	2.5			0.25	0.25	0	0
	0.833333	0.833333	1	2			0.25	0	0.5	0.25
